# Supplementary material for: Low carotid wall shear stress independently accelerates the progression of cognitive impairment and white matter lesions in the elderly
Source: PubMed Central journal article supplement (PMC5834267; doi:10.18632/oncotarget.23191), 2017-12-12
Supplement: oncotarget-09-11402-s001.pdf [file oncotarget-09-11402-s001.pdf]

# Low carotid wall shear stress independently accelerates the progression of cognitive impairment and white matter lesions in the elderly

## SUPPLEMENTARY MATERIALS

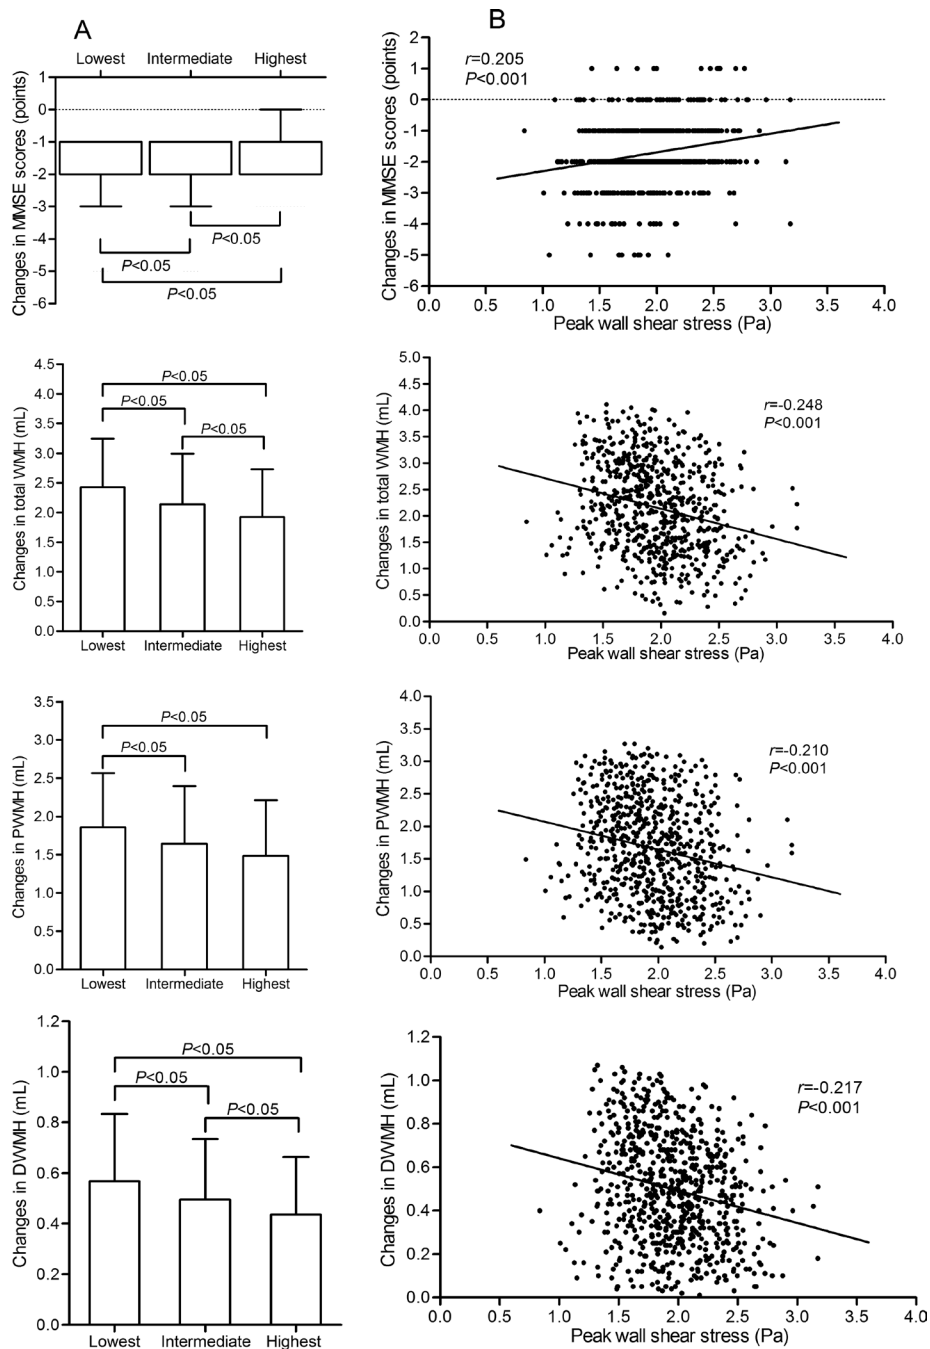

**Supplementary Figure 1: Cumulative hazard of cognitive impairment in participants grouped by the tertile of peak WSS.** Covariates included age; sex; education; and baseline body mass index, blood pressure, blood lipid files, fasting plasma glucose, carotid plaque, and MMSE score. WSS indicates wall shear stress.

**Supplementary Table 1: Baseline demographic and clinical characteristics of the participants grouped by the tertile of peak carotid wall shear stress**

| Characteristics                              | Lowest group<br>(n = 230)    | Intermediate group<br>(n = 230) | Highest group<br>(n = 229)   | F/ $\chi^2$ value | P value |
|----------------------------------------------|------------------------------|---------------------------------|------------------------------|-------------------|---------|
| Age, y                                       | 70.87 $\pm$ 6.33             | 70.55 $\pm$ 7.74                | 70.26 $\pm$ 6.15             | 0.462             | 0.630   |
| Sex, F:M                                     | 116:114                      | 119:111                         | 119:110                      | 0.126             | 0.939   |
| Education, y                                 | 7.00<br>(2.75 to 9.00)       | 7.00<br>(2.75 to 10.00)         | 8.00<br>(4.00 to 10.00)      | 3.740             | 0.154   |
| Risk factors                                 |                              |                                 |                              |                   |         |
| Hypertension, n (%)                          | 142 (61.74)                  | 134 (58.26)                     | 137 (59.83)                  | 0.581             | 0.748   |
| Diabetes mellitus, n (%)                     | 43 (18.70)                   | 38 (16.52)                      | 52 (22.71)                   | 2.900             | 0.235   |
| Dyslipidemia                                 | 100 (43.48)                  | 74 (32.17)*                     | 64 (27.95)*                  | 13.098            | 0.001   |
| TG >1.7 mmol/l, n (%)                        | 56 (24.35)                   | 44 (19.13)                      | 46 (20.09)                   | 2.124             | 0.346   |
| HDL-c <1.0 (male)/1.2 (female) mmol/l, n (%) | 58 (25.22)                   | 37 (16.09)*                     | 26 (11.35)*                  | 15.753            | < 0.001 |
| Smoking, n (%)                               | 75 (32.61)                   | 68 (29.57)                      | 42 (18.34)*, †               | 31.304            | < 0.001 |
| Alcohol consumption, n (%)                   | 87 (37.83)                   | 91 (39.57)                      | 90 (39.30)                   | 0.170             | 0.919   |
| Physical examination                         |                              |                                 |                              |                   |         |
| BMI, kg/m <sup>2</sup>                       | 25.44 $\pm$ 3.08             | 25.19 $\pm$ 2.77                | 25.23 $\pm$ 2.95             | 0.492             | 0.612   |
| SBP, mm Hg                                   | 145.00<br>(133.00 to 155.00) | 145.50<br>(133.75 to 157.25)    | 144.00<br>(133.00 to 155.00) | 0.605             | 0.739   |
| DBP, mm Hg                                   | 70.07 $\pm$ 8.01             | 69.50 $\pm$ 7.37                | 70.58 $\pm$ 6.77             | 1.209             | 0.299   |
| Heart rate, beats/min                        | 70.00<br>(65.00 to 74.00)    | 70.00<br>(66.00 to 75.00)       | 70.00<br>(67.00 to 74.00)    | 1.551             | 0.460   |
| Laboratory data                              |                              |                                 |                              |                   |         |
| TCHO, mmol/l                                 | 5.12 $\pm$ 0.69              | 5.00 $\pm$ 0.64                 | 5.03 $\pm$ 0.64              | 1.986             | 0.138   |
| TG, mmol/l                                   | 1.48 $\pm$ 0.34              | 1.48 $\pm$ 0.33                 | 1.45 $\pm$ 0.34              | 0.562             | 0.570   |
| HDL-c, mmol/l                                | 1.22 $\pm$ 0.22              | 1.22 $\pm$ 0.19                 | 1.25 $\pm$ 0.18              | 1.748             | 0.175   |
| LDL-c, mmol/l                                | 3.22 $\pm$ 0.69              | 3.10 $\pm$ 0.65                 | 3.12 $\pm$ 0.67              | 2.101             | 0.123   |
| FPG, mmol/l                                  | 5.26<br>(4.79 to 6.00)       | 5.09<br>(4.70 to 5.75)          | 5.17<br>(4.61 to 5.90)       | 2.848             | 0.241   |
| Carotid artery ultrasonographic parameter    |                              |                                 |                              |                   |         |
| VM, m/s                                      | 0.23 $\pm$ 0.07              | 0.27 $\pm$ 0.07*                | 0.30 $\pm$ 0.06*, †          | 67.562            | < 0.001 |
| Vps, m/s                                     | 0.52 $\pm$ 0.15              | 0.64 $\pm$ 0.13*                | 0.76 $\pm$ 0.13*, †          | 179.332           | < 0.001 |
| IDR, mm                                      | 7.32 $\pm$ 1.54              | 7.24 $\pm$ 1.27                 | 6.95 $\pm$ 1.08*             | 5.129             | 0.006   |
| IDT, mm                                      | 9.31 $\pm$ 2.35              | 9.27 $\pm$ 1.87                 | 9.07 $\pm$ 1.56              | 1.034             | 0.356   |
| Mean WSS, Pa                                 | 0.89 $\pm$ 0.21              | 1.05 $\pm$ 0.21*                | 1.24 $\pm$ 0.23*, †          | 147.662           | < 0.001 |
| Peak WSS, Pa                                 | 1.60<br>(1.46 to 1.69)       | 1.94<br>(1.86 to 2.02)*         | 2.33<br>(2.19 to 2.47)*, †   | 611.556           | < 0.001 |
| Intima-media thickness, mm                   | 1.46 $\pm$ 0.29              | 1.40 $\pm$ 0.27                 | 1.39 $\pm$ 0.29*             | 4.719             | 0.009   |
| Carotid plaque, n (%)                        | 108 (46.96)                  | 81 (35.22)*                     | 79 (34.50)*                  | 9.461             | 0.009   |
| Cognitive function                           |                              |                                 |                              |                   |         |
| MMSE score, points                           | 27.00<br>(25.00 to 28.00)    | 26.00<br>(25.00 to 28.00)       | 27.00<br>(25.00 to 28.00) †  | 6.193             | 0.045   |
| Brain WMLs                                   |                              |                                 |                              |                   |         |
| Total WMH, ml                                | 8.46 $\pm$ 2.94              | 8.56 $\pm$ 2.82                 | 7.95 $\pm$ 2.97              | 2.907             | 0.055   |
| PWMH, ml                                     | 6.28 $\pm$ 2.50              | 6.36 $\pm$ 2.41                 | 5.80 $\pm$ 2.50†             | 3.387             | 0.034   |
| DWMH, ml                                     | 2.18 $\pm$ 0.90              | 2.20 $\pm$ 0.97                 | 2.14 $\pm$ 0.93              | 0.204             | 0.815   |

Continuous variable data are expressed as mean  $\pm$  SD or median with interquartile range as appropriate. \* $P$  < 0.05, as compared with the low group; † $P$  < 0.05, as compared with the intermediate group. BMI indicates body mass index; SBP, systolic blood pressure; DBP, diastolic blood pressure; TCHO, total cholesterol; TG, triglyceride; HDL-c, high-density lipoprotein cholesterol; LDL-c, low-density lipoprotein cholesterol; FPG, fasting plasma glucose; VM, mean velocity; VPS, peak systolic velocity; IDR, internal diameters of the common carotid artery at the R wave of electrocardiogram; IDT, internal diameters of the common carotid artery at the peak T wave of electrocardiogram; WSS, wall shear stress; MMSE, Mini-Mental State Examination; WMLs, white matter lesions; WMH, white matter hyperintensities; PWMH, periventricular white matter hyperintensities; and DWMH, deep white matter hyperintensities.

**Supplementary Table 2: Changes of cognitive function and brain white matter hyperintensities grouped by the tertile of peak carotid wall shear stress during the follow-up period**

| Characteristics               | Lowest group<br>( <i>n</i> = 230) | Intermediate group<br>( <i>n</i> = 231) | Highest group<br>( <i>n</i> = 228) | F/ $\chi^2$ value | <i>P</i> value |
|-------------------------------|-----------------------------------|-----------------------------------------|------------------------------------|-------------------|----------------|
| Cognitive function            |                                   |                                         |                                    |                   |                |
| Changes in MMSE score, points | -2.00<br>(-2.00 to -1.00)         | -2.00<br>(-2.00 to -1.00)               | -2.00<br>(-2.00 to -1.00)          | 22.827            | < 0.001        |
| Brain WMLs                    |                                   |                                         |                                    |                   |                |
| Changes in Total WMH, ml      | 2.43 ± 0.82                       | 2.14 ± 0.85                             | 1.92 ± 0.81                        | 21.395            | < 0.001        |
| Changes in PWMH, ml           | 1.86 ± 0.71                       | 1.64 ± 0.75                             | 1.49 ± 0.72                        | 14.929            | < 0.001        |
| Changes in DWMH, ml           | 0.57 ± 0.27                       | 0.49 ± 0.24                             | 0.44 ± 0.23                        | 16.652            | < 0.001        |

Continuous variable data are expressed as mean ± SD or median (interquartile range), as appropriate. \**P* < 0.05, as compared with the low group; †*P* < 0.05, as compared with the intermediate group. MMSE, Mini-Mental State Examination; WMH, white matter hyperintensities; PWMH, periventricular white matter hyperintensities; and DWMH, deep white matter hyperintensities

**Supplementary Table 3: Potential factors related to the cognitive impairment and brain white matter lesions using a multiple linear backward stepwise regression analysis**

|                                                              | <b>B</b> | <b>SE</b> | <b>Beta value</b> | <b>t value</b> | <b>P value</b> | <b>95% CI for B</b> |
|--------------------------------------------------------------|----------|-----------|-------------------|----------------|----------------|---------------------|
| Changes in MMSE score are as dependent variable in the model |          |           |                   |                |                |                     |
| Peak WSS, Pa                                                 | 0.476    | 0.102     | 0.171             | 4.648          | 0.000          | 0.275 to 0.677      |
| Education, year                                              | 0.042    | 0.008     | 0.183             | 5.024          | 0.000          | 0.025 to 0.058      |
| Baseline TCHO, mmol/L                                        | -0.248   | 0.056     | -0.160            | -4.417         | 0.000          | -0.358 to -0.138    |
| Changes in total WMH are as dependent variable in the model  |          |           |                   |                |                |                     |
| Peak WSS, Pa                                                 | -0.513   | 0.085     | -0.221            | -6.060         | 0.000          | -0.680 to -0.347    |
| Baseline TCHO, mmol/L                                        | 0.092    | 0.047     | 0.071             | 1.980          | 0.048          | 0.001 to 0.184      |
| Baseline HDL-c, mmol/L                                       | -0.537   | 0.153     | -0.127            | -3.513         | 0.000          | -0.838 to -0.237    |
| Baseline FPG, mmol/L                                         | 0.092    | 0.025     | 0.133             | 3.681          | 0.000          | 0.043 to 0.142      |
| Baseline SBP, mm Hg                                          | 0.005    | 0.002     | 0.090             | 2.458          | 0.014          | 0.001 to 0.010      |
| Baseline DBP, mm Hg                                          | -0.008   | 0.004     | -0.073            | -1.995         | 0.046          | -0.017 to 0.000     |
| CCA plaque, negative                                         | -0.296   | 0.111     | -0.170            | -2.666         | 0.008          | -0.515 to -0.078    |
| Changes in PWMH are as dependent variable in the model       |          |           |                   |                |                |                     |
| Peak WSS, Pa                                                 | -0.370   | 0.075     | -0.182            | -4.911         | 0.000          | -0.518 to -0.222    |
| Baseline HDL-c, mmol/L                                       | -0.337   | 0.136     | -0.101            | -2.769         | 0.006          | -0.644 to -0.110    |
| Baseline FPG, mmol/L                                         | 0.072    | 0.022     | 0.119             | 3.244          | 0.001          | 0.029 to 0.116      |
| Baseline SBP, mm Hg                                          | 0.005    | 0.002     | 0.089             | 2.424          | 0.016          | 0.001 to 0.008      |
| CCA plaque, negative                                         | -0.261   | 0.099     | -0.171            | -2.635         | 0.009          | -0.455 to -0.066    |
| Changes in DWMH are as dependent variable in the model       |          |           |                   |                |                |                     |
| Peak WSS, Pa                                                 | -0.139   | 0.025     | -0.203            | -5.532         | 0.000          | -0.188 to -0.090    |
| Baseline HDL-c, mmol/L                                       | -0.173   | 0.046     | -0.138            | -3.767         | 0.000          | -0.263 to -0.083    |
| Baseline FPG, mmol/L                                         | 0.017    | 0.008     | 0.083             | 2.267          | 0.024          | 0.002 to 0.032      |
| Baseline DBP, mm Hg                                          | -0.004   | 0.001     | -0.106            | -2.907         | 0.004          | -0.006 to -0.001    |

Independent factors in all analyses included peak WSS; age; sex; education; smoking; alcohol consumption; body mass index; and baseline blood pressure, blood lipids, FPG, CCA plaque, MMSE scores, and WMLs volume. MMSE indicates Mini-Mental State Examination; WMH, white matter hyperintensities; PWMH, periventricular white matter hyperintensities; DWMH, deep white matter hyperintensities; WSS, wall shear stress; TCHO, total cholesterol; HDL-c, high-density lipoprotein cholesterol; FPG, fasting plasma glucose; SBP, systolic blood pressure; DBP, diastolic blood pressure.
